# Supplementary material
Source: MDPI journal article supplement (https://www.mdpi.com/2077-1312/9/9/1034)
Supplement: s1 [file s1]

## Supplementary material

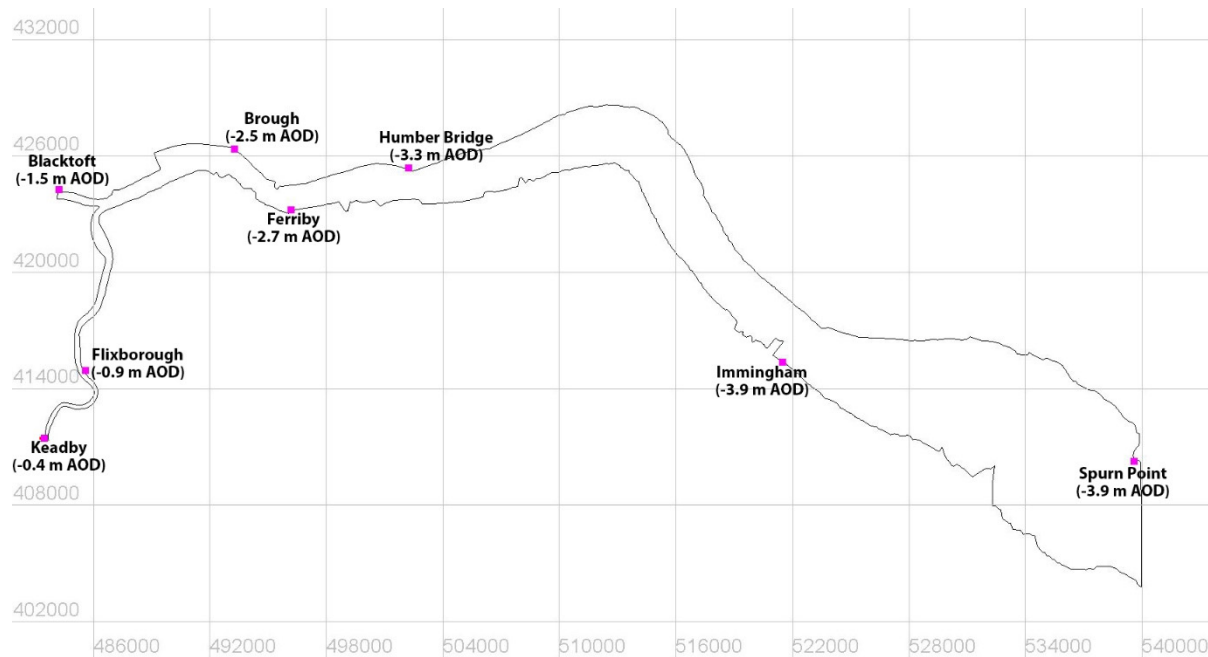

**Figure S1: Outline of the Humber Estuary showing metres Above Ordnance Datum (m AOD) at various locations.**

**Table S1: Seasonal mean discharges of freshwater ( $\text{m}^3 \text{s}^{-1}$ ) into the Humber Estuary in the period 2007 – 2017 (UK Environment Agency data)**

| Season       | River Ouse | River Trent |
|--------------|------------|-------------|
| Summer (JJA) | 30.95      | 65.53       |
| Autumn (SON) | 53.13      | 71.43       |
| Winter (DJF) | 102.60     | 141.98      |
| Spring (MAM) | 40.45      | 77.85       |

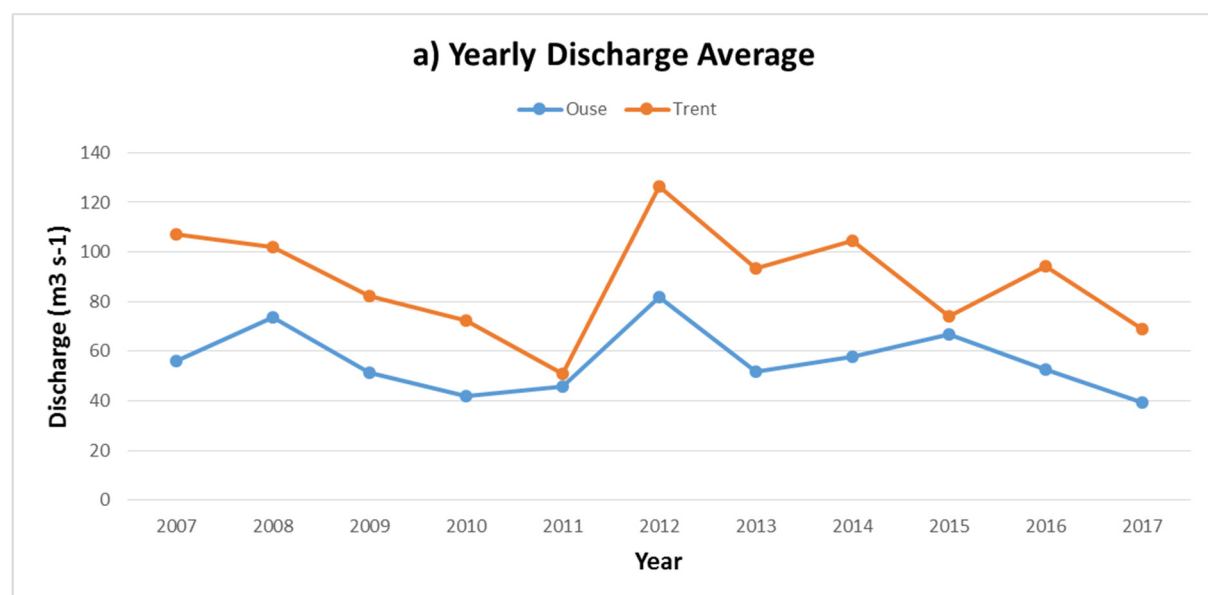

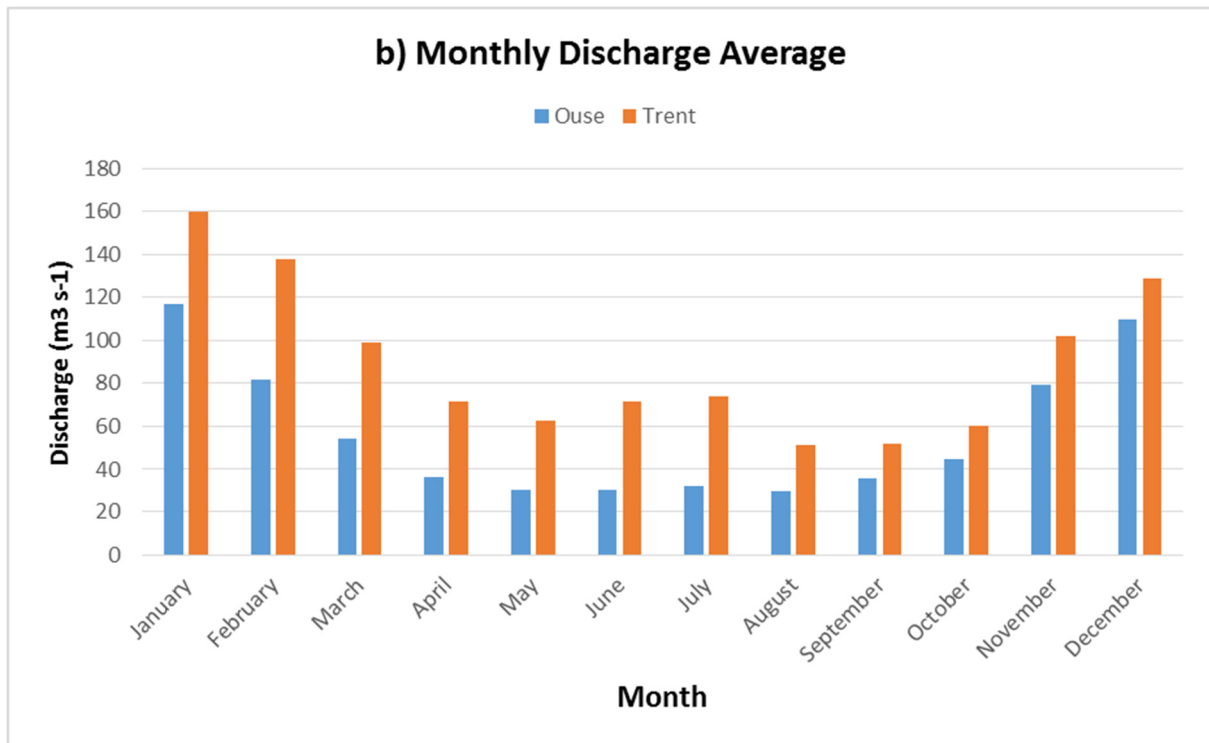

**Figure S2: a) Yearly discharge averages for Rivers Ouse and Trent; b) Monthly discharge averages for Rivers Ouse and Trent (2007 – 2017).**

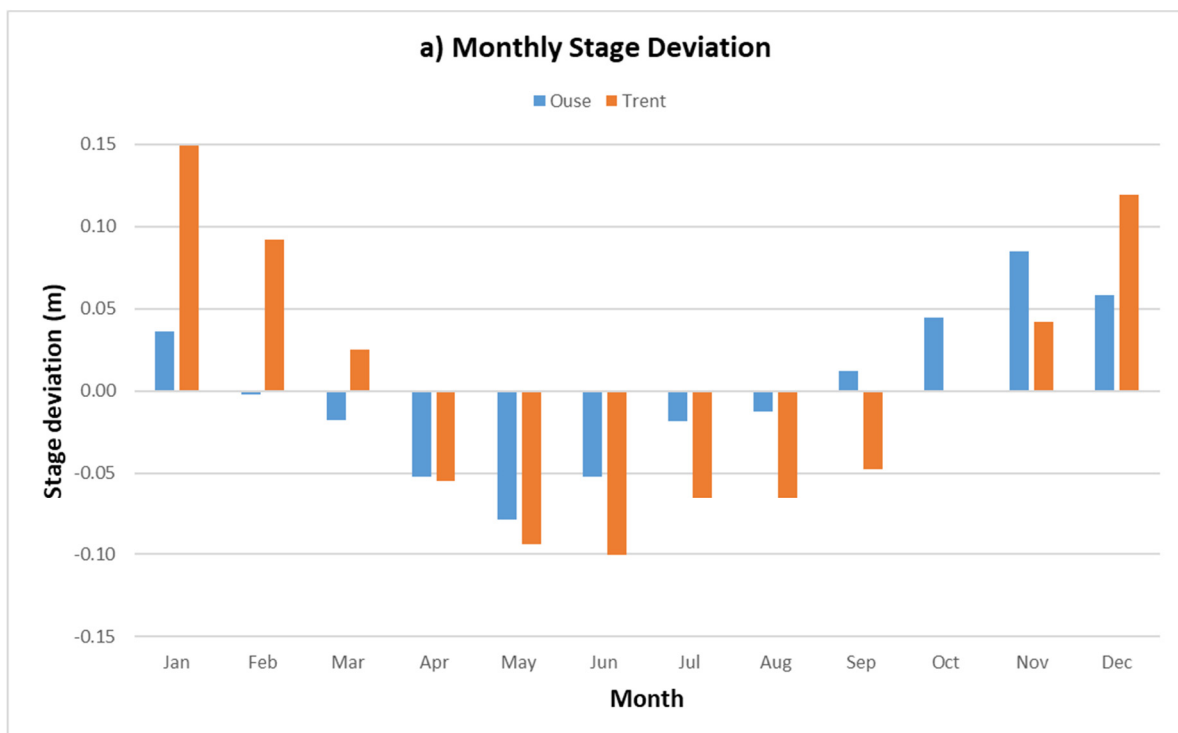

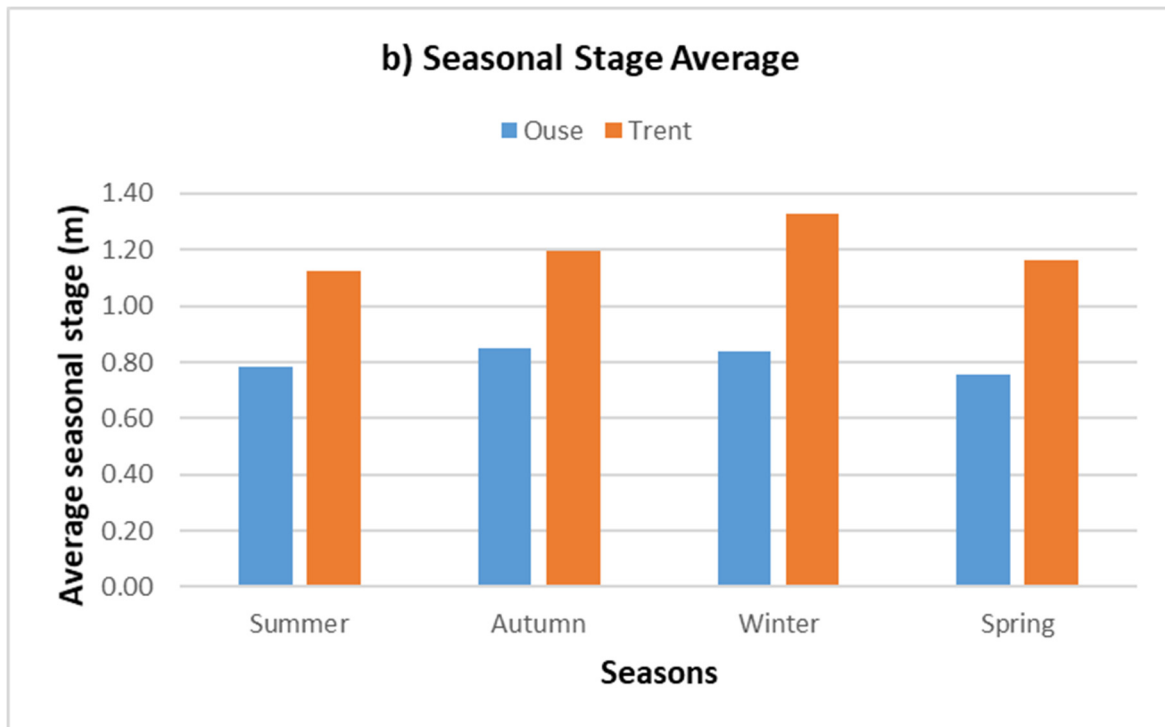

**Figure S3: a) Average monthly deviations from annual stage averages (m) at Blacktoft (River Ouse) and Keady (River Trent) from 2007 to 2017; b) Seasonal stage averages (m) at Blacktoft and Keadby (2007 – 2017). Seasonal definitions: summer = JJA; winter = DJF.**

**Table S2: Summary of the oil slick release scenarios (tidal stage is with reference to Immingham station). Scenarios are repeated for both L1 and L2.**

| Scenario | Oil release time     |                        |
|----------|----------------------|------------------------|
|          | Summer (August 2017) | Winter (February 2010) |
| HW NT    | 02/08/2017 (02:00)   | 07/02/2010 (23:15)     |
| LW NT    | 01/08/2017 (18:45)   | 06/02/2010 (17:30)     |
| HW ST    | 08/08/2017 (18:00)   | 01/02/2010 (19:30)     |
| LW ST    | 08/08/2017 (00:15)   | 01/02/2010 (14:00)     |

Note: HW = high water; LW = low water; NT = neap tide; ST = spring tide.

**Table S3: Wind speed and direction applied to the oil spill simulation.**

| Season                 | Wind Speed (m s <sup>-1</sup> ) | Wind Direction (degree) |
|------------------------|---------------------------------|-------------------------|
| Summer (August 2017)   | 4.75                            | 211                     |
| Winter (February 2010) | 6.05                            | 167                     |

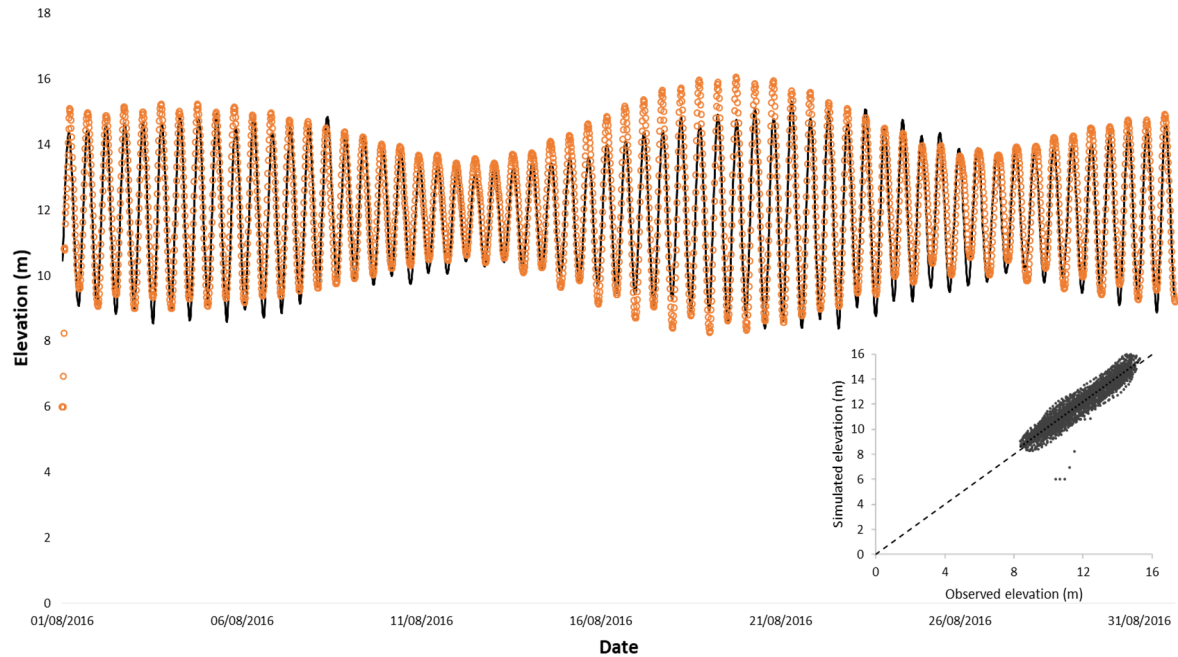

**Figure S4: Observed (line) and simulated (points) free surface elevations at Immingham for the validation summer period (August 2016). Inset: Point correlation between observed and simulated tidal elevations ( $R^2 = 0.912$ ).**

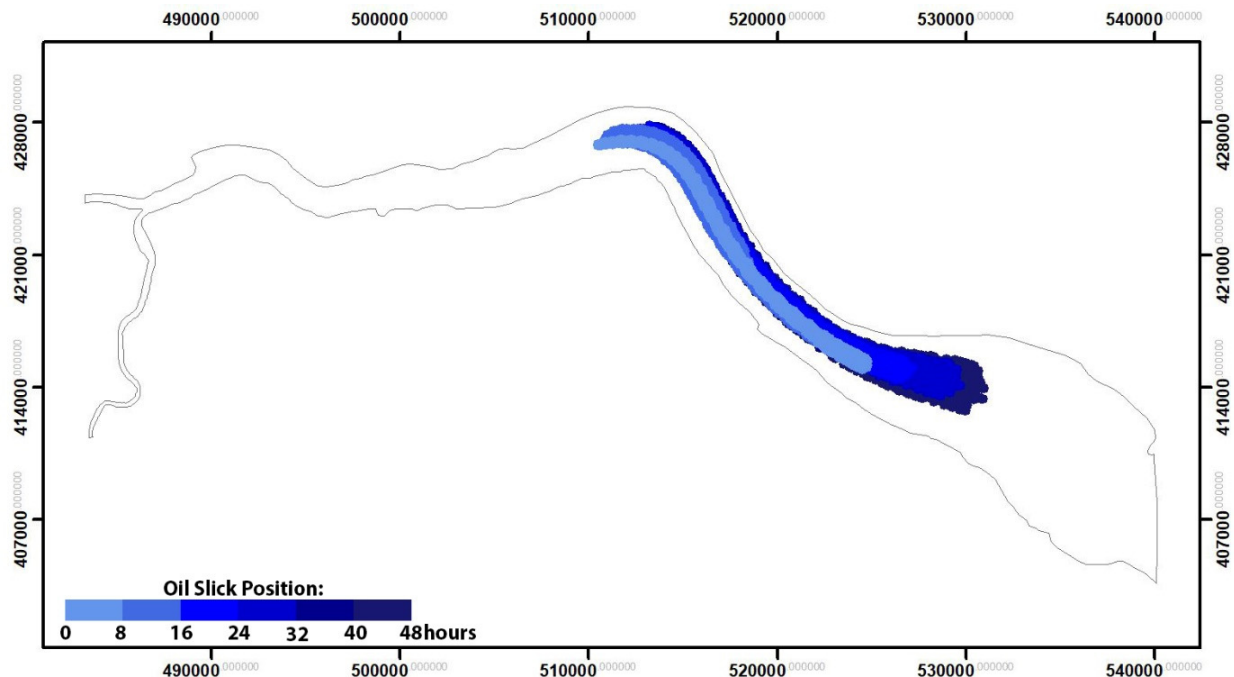

**Figure S5: Example simulated oil spill trajectory, released from L2 at high water spring in winter.**

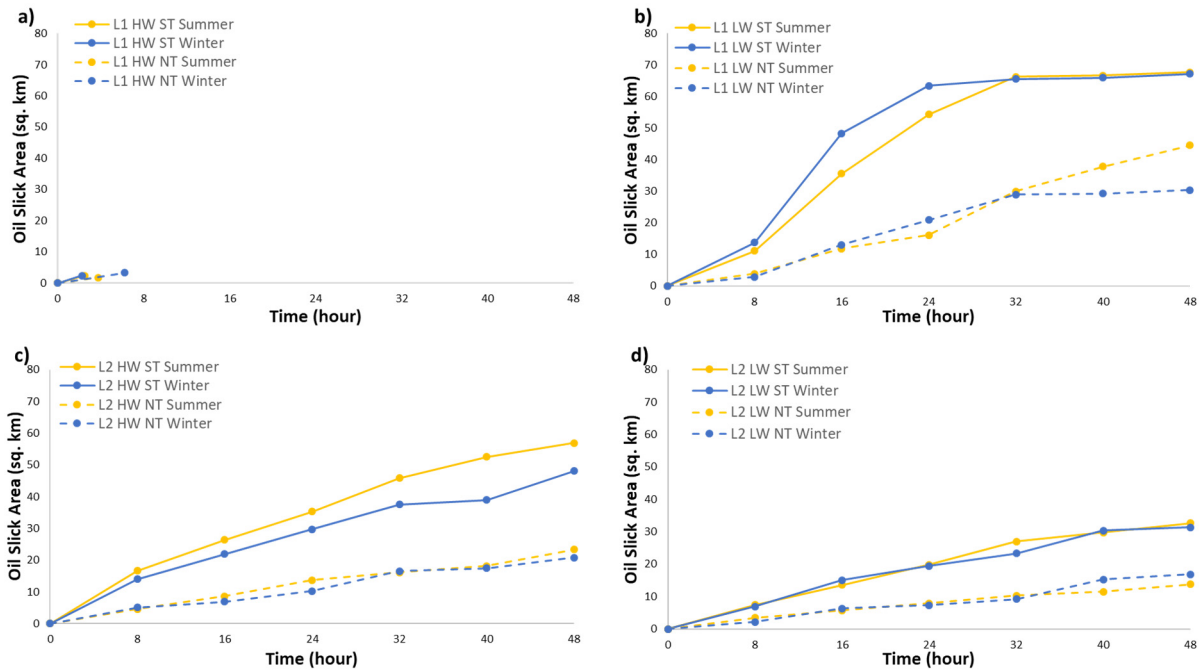

**Figure S6: Area covered by simulated oil slick over time for a spill a) at L1 HW; b) at L1 LW; c) at L2 HW; d) L2 LW at spring tide (solid line) and neap tide (dashed line) in different seasons.**

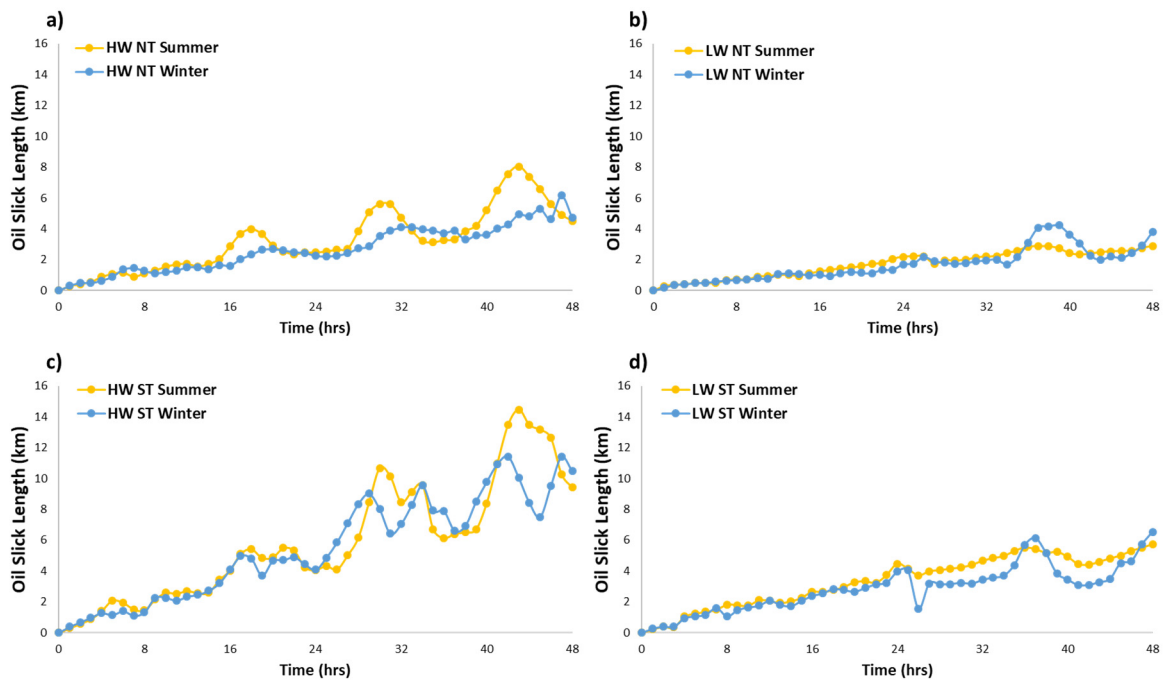

**Figure S7: L2 oil slick length over time for a spill a) at HW NT; b) at LW NT; c) at HW ST; d) LW ST.**

**Table S4: Relative properties of comparable oil slicks released in the summer and winter (ratio = summer value / winter value), as measured 48 hours after the spill.**

|          | impacted area<br>ratio |      |      |      |      |      | length<br>ratio | distance<br>ratio |
|----------|------------------------|------|------|------|------|------|-----------------|-------------------|
|          | 8 h                    | 16 h | 24 h | 32 h | 40 h | 48 h | 48 h            | 48 h              |
| L2 HW NT | 0.92                   | 1.25 | 1.34 | 0.98 | 1.04 | 1.12 | 0.96            | 0.98              |
| L2 LW NT | 1.56                   | 0.91 | 1.09 | 1.13 | 0.75 | 0.81 | 0.76            | 0.73              |
| L2 HW ST | 1.19                   | 1.21 | 1.21 | 1.22 | 1.35 | 1.18 | 0.90            | 1.01              |
| L2 LW ST | 1.07                   | 0.90 | 1.02 | 1.16 | 0.98 | 1.04 | 0.88            | 0.83              |
| Average  | 1.19                   | 1.07 | 1.17 | 1.12 | 1.03 | 1.04 | 0.88            | 0.89              |

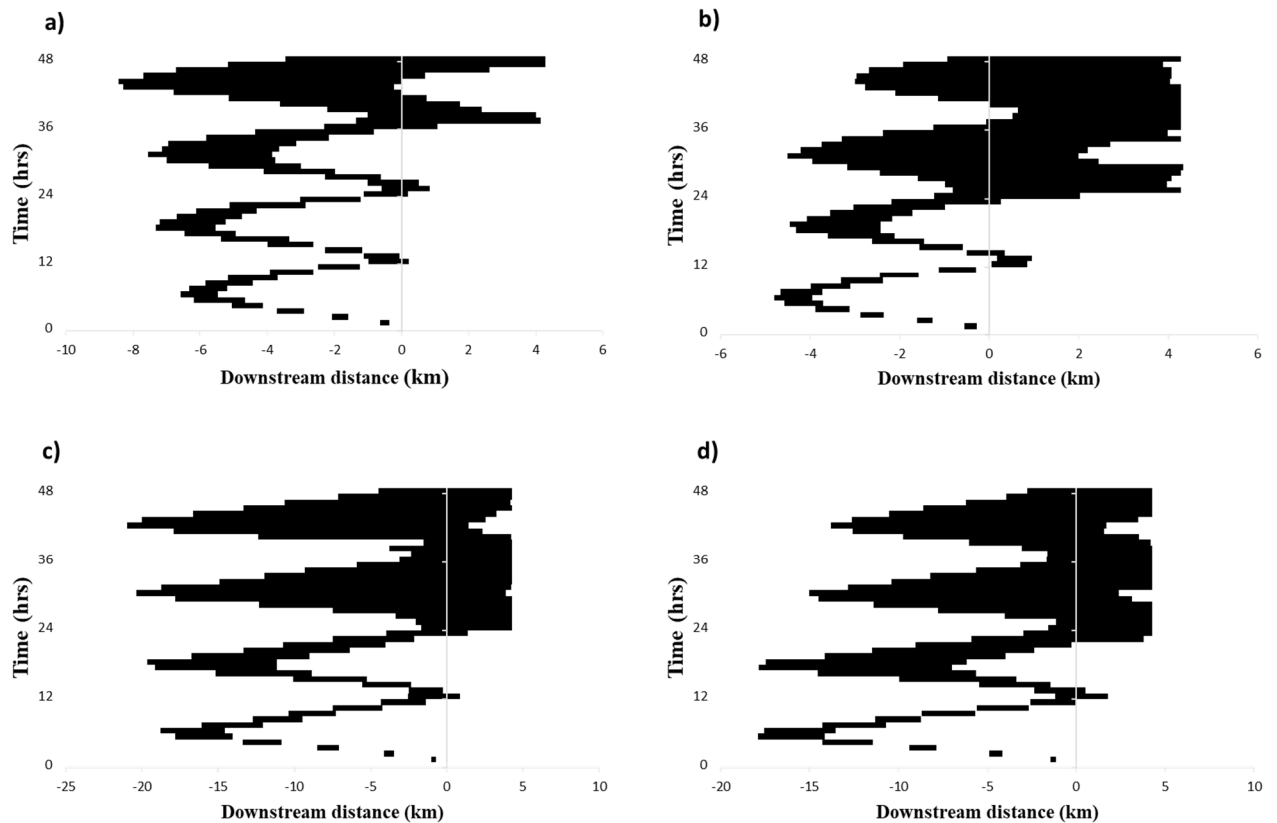

**Figure S8: Longitudinal position and extent of L1 oil slicks over time: a) LW NT summer; b) LW NT winter; c) LW ST summer; and d) LW ST winter**

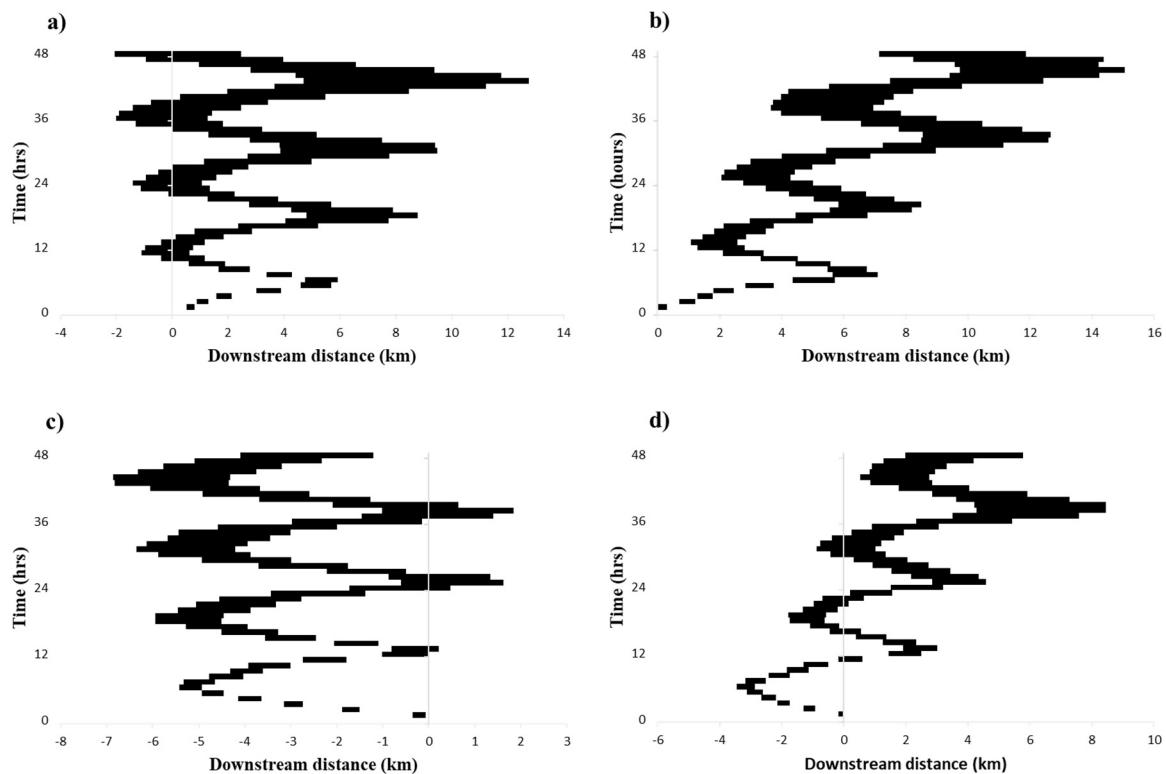

**Figure S9: Longitudinal position and extent of L2 oil slicks over time: a) HW NT summer; b) HW NT winter; c) LW NT summer; and d) LW NT winter**

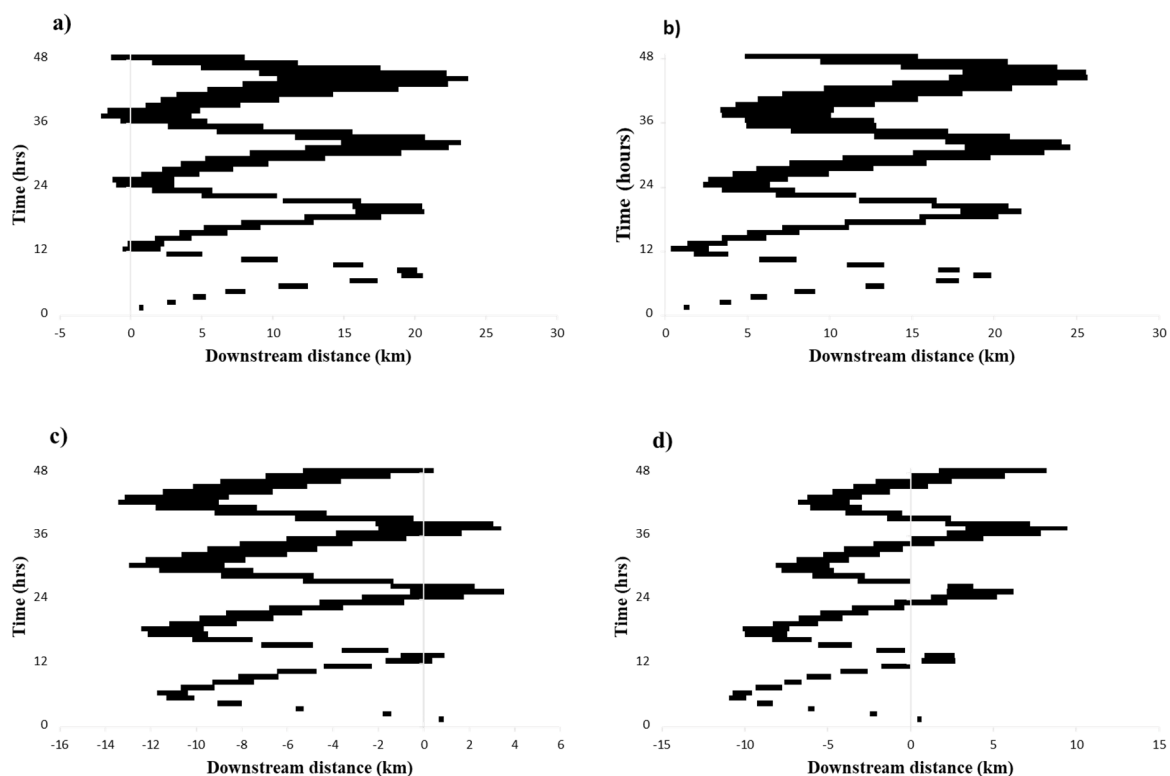

**Figure S10: Longitudinal position and extent of L2 oil slicks over time: a) HW ST summer; b) HW ST winter; c) LW ST summer; and d) LW ST winter**

**Table S5: Summary of maximum oil slick displacement (km) from point of release.**

|          | upstream<br>displacement<br>(summer) | upstream<br>displacement<br>(winter) | downstream<br>displacement<br>(summer) | downstream<br>displacement<br>(winter) |
|----------|--------------------------------------|--------------------------------------|----------------------------------------|----------------------------------------|
| L2 HW NT | 2.07                                 | 0                                    | 12.75                                  | 15.05                                  |
| L2 LW NT | 6.85                                 | 3.46                                 | 1.84                                   | 8.44                                   |
| L2 HW ST | 2.10                                 | 0                                    | 23.75                                  | 25.67                                  |
| L2 LW ST | 13.43                                | 10.96                                | 3.52                                   | 9.45                                   |

**Table S6: Relative properties of comparable oil slicks released at spring and neap tides (ratio = ST value / NT value), as measured 48 hours after the spill.**

|              | impacted area<br>ratio |      |      |      |      |      | length<br>ratio | distance<br>ratio |
|--------------|------------------------|------|------|------|------|------|-----------------|-------------------|
|              | 8 h                    | 16 h | 24 h | 32 h | 40 h | 48 h | 48 h            | 48 h              |
| L2 HW summer | 3.61                   | 3.06 | 2.57 | 2.85 | 2.89 | 2.44 | 2.08            | 1.74              |
| L2 HW winter | 2.78                   | 3.16 | 2.90 | 2.28 | 2.23 | 2.31 | 2.22            | 1.71              |
| L2 LW summer | 2.17                   | 2.35 | 2.50 | 2.62 | 2.60 | 2.37 | 1.99            | 1.95              |
| L2 LW winter | 3.16                   | 2.38 | 2.67 | 2.54 | 1.99 | 1.86 | 1.71            | 1.72              |
| Average      | 2.93                   | 2.74 | 2.66 | 2.57 | 2.43 | 2.25 | 2.00            | 1.78              |

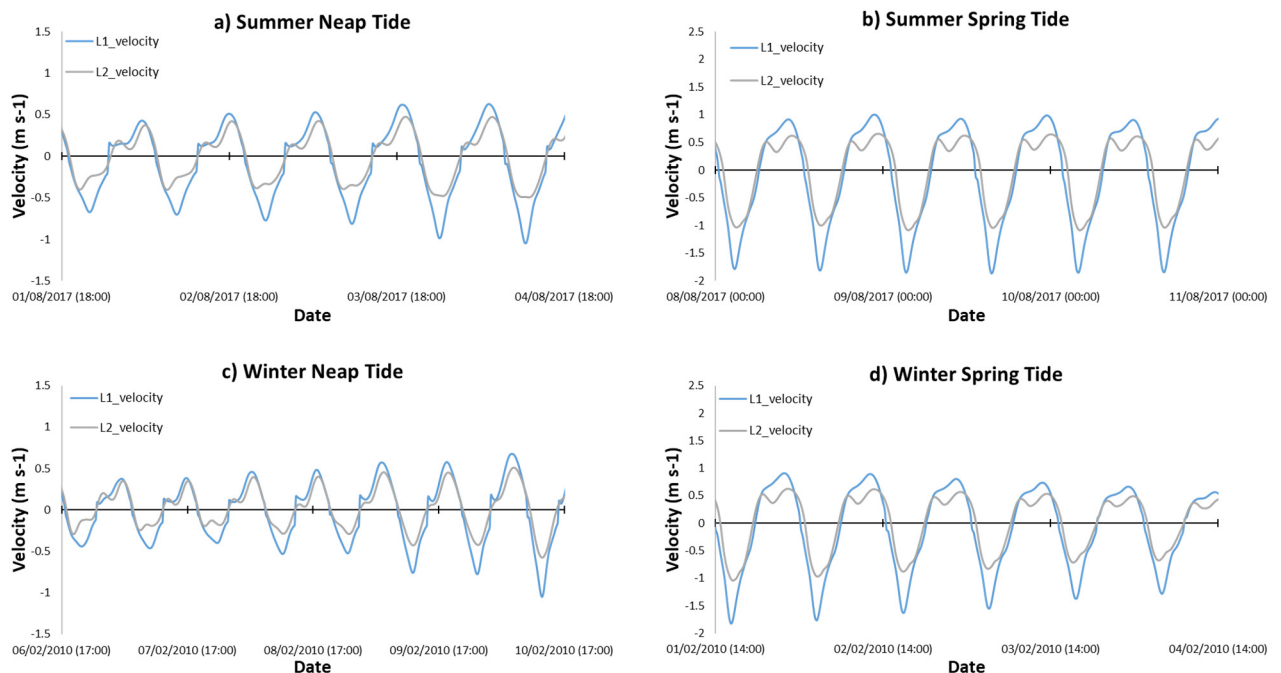

**Figure S11: Simulated free surface velocities covering the duration of oil spill during a) SU NT; b) SU ST; c) WI NT; and d) WI ST. Note: negative current velocity indicates upstream movement while positive current velocity indicates downstream movement.**



**Table S7: Relative properties of comparable oil slicks released at high and low water (ratio = HW value / LW value), as measured 48 hours after the spill.**

|              | impacted area<br>ratio |      |      |      |      |      | length<br>ratio | distance<br>ratio |
|--------------|------------------------|------|------|------|------|------|-----------------|-------------------|
|              | 8 h                    | 16 h | 24 h | 32 h | 40 h | 48 h | 48 h            | 48 h              |
| L2 NT summer | 1.34                   | 1.49 | 1.73 | 1.56 | 1.59 | 1.69 | 1.57            | 1.71              |
| L2 NT winter | 2.29                   | 2.29 | 1.40 | 1.80 | 1.16 | 1.23 | 1.24            | 1.26              |
| L2 ST summer | 2.23                   | 1.94 | 1.81 | 1.70 | 1.76 | 1.74 | 1.64            | 1.53              |
| L2 ST winter | 2.02                   | 1.45 | 1.52 | 1.61 | 1.28 | 1.53 | 1.61            | 1.26              |
| Average      | 1.97                   | 1.79 | 1.62 | 1.67 | 1.45 | 1.55 | 1.52            | 1.44              |

**Table S8: Ratios between impacted areas of oil slick released at L1 and L2.**

|              | 8h   | 16 h | 24 h | 32 h | 40 h | 48 h |
|--------------|------|------|------|------|------|------|
| LW ST summer | 1.15 | 2.06 | 2.03 | 2.90 | 3.30 | 3.23 |
| LW ST winter | 1.33 | 2.07 | 2.87 | 3.15 | 1.92 | 1.80 |
| LW NT summer | 1.49 | 2.62 | 2.74 | 2.45 | 2.24 | 2.07 |
| LW NT winter | 1.99 | 3.21 | 3.26 | 2.81 | 2.18 | 2.14 |
